# Supplementary material for: Validating the rigour of adaptive methods of economic evaluation
Source: HighWire-hosted journal article supplement (doi:10.1136/bmjgh-2023-012277), 2023-09-01
Supplement: bmjgh-2023-012277supp001_data_supplement.pdf [file bmjgh-2023-012277supp001_data_supplement.pdf]

## Appendices

## Appendix 1: PubMed search strategy for trastuzumab

#1 breast neoplasm  
#2 breast carcinoma  
#3 cancer of breast  
#4 mammary cancer  
#5 (breast neoplasm[MeSH]  
#6 **1 OR #2 OR #3 OR #4 OR #5**  
#7 trastuzumab  
#8 herceptin  
#9 Epidermal growth factor receptor 2 OR  
#10 her2  
#11 erbB-2 receptor  
#12 **#7 OR #8 OR #9 OR #10 OR #11**  
#13 cost benefit analys\*  
#14 cost-benefit analysis[MeSH]  
#15 cost utility analys\*  
#16 cost-utility analysis[MeSH]  
#17 cost effectiveness  
#18 cost effectiveness analys\*  
#19 cost-effectiveness analysis[MeSH]  
#20 cost minimization analys\*  
#21 cost-minimization analysis[MeSH]  
#22 economic evaluation\*  
#23 pharmaco-economic evaluation  
#24 pharmaco-economic analys\*  
#25 pharmaco-economic analysis[MeSH]  
#26 health technology assessment\*  
#27 **#13 OR #14 OR #15 OR #16 OR #17 OR #18 OR #19 OR #20 OR #21 OR #22 OR #23 OR  
#24 OR #25 OR #26**  
#28 **#6 AND #12 AND #27**  
Filters: Publication date: Last 10 years to 31.5.2023  
No language restrictions

## Appendix 2: PubMed search strategy for IMRT

- #1 Head and Neck Neoplasms [MeSH]
- #2 Neoplasms, Head and Neck
- #3 Head, Neck Neoplasms
- #4 Cancer of Head and Neck
- #5 Head and Neck Cancer
- #6 (Cancer of the Head and Neck
- #7 Head and neck squamous cell carcinoma
- #8 Oropharyngeal Neoplasms [MeSH]
- #9 Neoplasm, Oropharyngeal
- #10 Cancer of Oropharynx
- #11 Oropharynx Cancer
- #12 Oropharyngeal Cancer
- #13 Laryngeal Neoplasms [MeSH]
- #14 Larynx Neoplasms
- #15 Cancer of Larynx
- #16 Laryngeal Cancer
- #17 Larynx Cancer
- #18 Supraglottic Cancer
- #19 Cancer of supraglottis
- #20 Cancer of supraglottic region
- #21 Nasopharyngeal Neoplasms [MeSH]
- #22 Cancer of Nasopharynx
- #23 Nasopharynx Cancers
- #24 Nasopharyngeal Cancer
- #25 Hypopharyngeal Neoplasms [MeSH]
- #26 Hypopharyngeal Cancer
- #27 Cancer, Hypopharyngeal
- #28 Hypopharynx cancer
- #29 Cancer of hypopharynx
- #30 Mouth Neoplasms [MeSH]
- #31 Oral Cancer)
- #32 Paranasal Sinus Neoplasms[MeSH]
- #33 Paranasal Sinus Cancer
- #34 Cancer, Paranasal Sinus
- #35 Salivary Gland Neoplasms [MeSH]
- #36 Cancer of Salivary Gland
- #37 Salivary Gland Cancer
- #38 Lip Neoplasms [MeSH])
- #39 Cancer of Lip
- #40 Lip Cancers
- #41 Tongue Neoplasms [MeSH]
- #42 Cancer of Tongue
- #43 Tongue Cancers
- #44 Tongue Neoplasm
- #45 Sinonasal cancer

**#46 #1 OR #2 OR #3 OR #4 OR #5 OR #6 OR #7 OR #8 OR #9 OR #10 OR #11 OR #12 OR #13 OR #14 OR #15 OR #16 OR #17 OR #18 OR #19 OR #20 OR #21 OR #22 OR #23 OR #24 OR #25 OR #26 OR #27 OR #28 OR #29 OR #30 OR #31 OR #32 OR #33 OR #34 OR #35 OR #36 OR #37 OR #38 OR #39 OR #40 OR #41 OR #42 OR #43 OR #44 OR #45**  
#47 Radiotherapy, Intensity-Modulated"[MeSH]  
#48 Intensity-Modulated Radiotherapies  
#49 Radiotherapy, Intensity Modulated  
#50 Intensity-Modulated Radiation therapy  
#51 IMRT  
**#52 #47 OR #47 OR #48 OR #49 OR #51**  
#53 Conventional radiation therapy  
#54 Conventional radiotherapy Cobalt radiotherapy  
#55 Cobalt radiation therapy  
#56 2 Dimensional radiotherapy  
#57 2 Dimensional Radiation therapy  
#58 2 DRT  
#59 2drt  
#60 2-DRT  
#61 3 DCRT  
#62 3 Dimensional conformal radiotherapy  
#63 3 Dimensional conformal radiation therapy  
#64 3 dcert  
#65 Linear accelerator  
**#66 #52 OR #53 OR #54 OR #55 OR #56 OR #57 OR #58 OR #59 OR #60 OR #61 OR #62 OR #63**  
#67 cost benefit analys\*  
#68 cost-benefit analysis[MeSH]  
#69 cost utility analys\*  
#70 cost-utility analysis[MeSH]  
#71 cost effectiveness  
#72 cost effectiveness analys\*  
#73 cost-effectiveness analysis[MeSH]  
#74 cost minimization analys\*  
#75 cost-minimization analysis[MeSH]  
#76 economic evaluation\*  
#77 pharmaco-economic evaluation  
#78 pharmaco-economic analys\*  
#79 pharmaco-economic analysis[MeSH]  
#80 health technology assessment\*  
**#81 #66 OR #67 OR #68 OR #69 OR #70 OR #71 OR #72 OR #73 OR #74 OR #75 OR #76 OR #77 OR #78 OR #79**  
**#82 #46 AND #52 AND #66 AND #81**  
#83 Filters: Publication date: Last 10 years to 31.5.202  
No language restrictions

## Appendix 3: Antonanza's checklist

| <b>GENERAL TRANSFERABILITY INDEX (IT1)</b>                                                                                                                                                                                                                                                                                                                                                                                                                                                                                                                                                                                                                                                                                                                                                                                                                                                     |                                                                                                                                                                                                                                                                                                                                                                                                                                                                                                                                                                                                                                                                                                                                                                                                                                                                                                                                                                                                                                                                                                                                                                                                                                                                                                                                                                                                                                    |
|------------------------------------------------------------------------------------------------------------------------------------------------------------------------------------------------------------------------------------------------------------------------------------------------------------------------------------------------------------------------------------------------------------------------------------------------------------------------------------------------------------------------------------------------------------------------------------------------------------------------------------------------------------------------------------------------------------------------------------------------------------------------------------------------------------------------------------------------------------------------------------------------|------------------------------------------------------------------------------------------------------------------------------------------------------------------------------------------------------------------------------------------------------------------------------------------------------------------------------------------------------------------------------------------------------------------------------------------------------------------------------------------------------------------------------------------------------------------------------------------------------------------------------------------------------------------------------------------------------------------------------------------------------------------------------------------------------------------------------------------------------------------------------------------------------------------------------------------------------------------------------------------------------------------------------------------------------------------------------------------------------------------------------------------------------------------------------------------------------------------------------------------------------------------------------------------------------------------------------------------------------------------------------------------------------------------------------------|
| <b>Critical objective factors</b>                                                                                                                                                                                                                                                                                                                                                                                                                                                                                                                                                                                                                                                                                                                                                                                                                                                              | <b>Non-critical objective factors</b>                                                                                                                                                                                                                                                                                                                                                                                                                                                                                                                                                                                                                                                                                                                                                                                                                                                                                                                                                                                                                                                                                                                                                                                                                                                                                                                                                                                              |
| <ol style="list-style-type: none"> <li>1. <i>The relevant parameters needed to calculate the ratio cost/effectiveness are given in the study</i></li> <li>2. <i>Objectives are presented in a clear, specific and measurable manner</i></li> <li>3. <i>The variable estimates used in the analysis come from the best available source</i></li> <li>4. <i>The measurement of costs is appropriate and the methodology for estimation of quantity and unit costs is clearly described</i></li> <li>5. <i>Health outcome measures are based on valid and reliable scales. Otherwise, the scales used must be fully justified</i></li> <li>6. <i>The economic model, study methods and components of the costs and effectiveness are presented in a clear manner</i></li> <li>7. <i>The conclusions and recommendations of the study are justified and based on the study results.</i></li> </ol> | <ol style="list-style-type: none"> <li>1. <i>Is the intervention described in sufficient detail?</i></li> <li>2. <i>Is the comparator described in sufficient detail?</i></li> <li>3. <i>Is the country in which the economic study took place clearly specified?</i></li> <li>4. <i>Did the authors correctly state the perspective for the economic analysis?</i></li> <li>5. <i>Is the target population of the health technology clearly stated or can it be inferred by reading the article?</i></li> <li>6. <i>Does the article provide sufficient detail about the study sample?</i></li> <li>7. <i>Have the principal estimates of effectiveness measures been reported?</i></li> <li>8. <i>Are the results of a statistical analysis of the effectiveness results provided?</i></li> <li>9. <i>Is the level of reporting of benefit data adequate (incremental analysis, statistical analyses)?</i></li> <li>10. <i>Are the cost components used in the analysis presented?</i></li> <li>11. <i>Are unit price for resources given?</i></li> <li>12. <i>Are costs and quantities reported separately?</i></li> <li>13. <i>Is the price year given?</i></li> <li>14. <i>Is the currency unit reported?</i></li> <li>15. <i>Are quantitative &amp;/or descriptive analyses conducted to explore variability from place to place</i></li> <li>16. <i>Did the authors discuss the generalizability of results?</i></li> </ol> |
| <b>SPECIFIC TRANSFERABILITY INDEX (IT2)</b>                                                                                                                                                                                                                                                                                                                                                                                                                                                                                                                                                                                                                                                                                                                                                                                                                                                    |                                                                                                                                                                                                                                                                                                                                                                                                                                                                                                                                                                                                                                                                                                                                                                                                                                                                                                                                                                                                                                                                                                                                                                                                                                                                                                                                                                                                                                    |
| <b>Critical subjective factors</b>                                                                                                                                                                                                                                                                                                                                                                                                                                                                                                                                                                                                                                                                                                                                                                                                                                                             | <b>Non-critical subjective factors</b>                                                                                                                                                                                                                                                                                                                                                                                                                                                                                                                                                                                                                                                                                                                                                                                                                                                                                                                                                                                                                                                                                                                                                                                                                                                                                                                                                                                             |
| <ol style="list-style-type: none"> <li>1. <i>The evaluated technology is used in the new health context.</i></li> <li>2. <i>The comparator is available or used in the new context.</i></li> <li>3. <i>Treatment and comparator data, as well as relevant epidemiological parameters for the technology, are valid in the new context.</i></li> <li>4. <i>The study perspective coincides with that used in the new context</i></li> </ol>                                                                                                                                                                                                                                                                                                                                                                                                                                                     | <ol style="list-style-type: none"> <li>1. <i>Cost components correspond to the medical practice related to the evaluated technology in the original study. If medical practice differs in new context, additional costs components must be taken into account.</i></li> <li>2. <i>The model connecting variables and parameters can be adapted to the new context.</i></li> <li>3. <i>Life expectancy is similar in both contexts.</i></li> <li>4. <i>Health-status preferences are similar in both contexts. (Applicable to cost/utility analyses)</i></li> <li>5. <i>Productivity measures are similar in both contexts</i></li> <li>6. <i>The evolution of the disease is similar in both contexts.</i></li> <li>7. <i>The applied discount rate is similar in both contexts.</i></li> <li>8. <i>Costs and health effects data are presented in current and discounted units</i></li> </ol>                                                                                                                                                                                                                                                                                                                                                                                                                                                                                                                                     |

## Appendix 4: Calculation of cost correction factors

| Name of country (Year) | Country                                                         |                                             | India                                                           |                                             | Correction factor (A) | Correction factor (B) |
|------------------------|-----------------------------------------------------------------|---------------------------------------------|-----------------------------------------------------------------|---------------------------------------------|-----------------------|-----------------------|
|                        | Health care expenditure per capita (PPP adjusted) in US dollars | GDP per capita (PPP adjusted) in US dollars | Health care expenditure per capita (PPP adjusted) in US dollars | GDP per capita (PPP adjusted) in US dollars |                       |                       |
| Iran (2018)            | 1225.0                                                          | 14535.9                                     | 181.5                                                           | 6182.9                                      | <b>0.121</b>          | <b>0.244</b>          |
| Iran (2014)            | 1164.0                                                          | 17388.9                                     | 141.4                                                           | 4236.7                                      | <b>0.121</b>          | <b>0.244</b>          |
| Brazil (2022)          | 1438.7                                                          | 15020.4                                     | 195.6                                                           | 6675.4                                      | <b>0.135</b>          | <b>0.444</b>          |
| Philippines            | 321.6                                                           | 8121.0                                      | 181.5                                                           | 6183.0                                      | <b>0.564</b>          | <b>0.761</b>          |
| Colombia 2013          | 751.3                                                           | 10732.0                                     | 141.4                                                           | 4237.0                                      | <b>0.188</b>          | <b>0.395</b>          |
| Thailand               | 523.0                                                           | 14871.0                                     | 161.8                                                           | 4861.2                                      | <b>0.309</b>          | <b>0.326</b>          |
| Netherlands            | 4989.0                                                          | 47272.1                                     | 161.9                                                           | 4861.2                                      | <b>0.032</b>          | <b>0.103</b>          |
| Cyprus                 | 2532.9                                                          | 38288.0                                     | 181.5                                                           | 6182.9                                      | <b>0.072</b>          | <b>0.161</b>          |
| Canada                 | 4153.8                                                          | 38865.4                                     | 138.7                                                           | 3912.4                                      | <b>0.033</b>          | <b>0.100</b>          |
| USA                    | 8342.6                                                          | 51602.9                                     | 161.8                                                           | 4861.2                                      | <b>0.019</b>          | <b>0.094</b>          |
| UK                     | 3997.3                                                          | 40218.7                                     | 189.6                                                           | 5057.2                                      | <b>0.047</b>          | <b>0.125</b>          |
| Peru                   | 511.0                                                           | 10767.0                                     | 161.8                                                           | 4861.0                                      | <b>0.316</b>          | <b>0.451</b>          |
| Colombia (2015)        | 802.7                                                           | 12018                                       | 161.8                                                           | 4861.0                                      | <b>0.201</b>          | <b>0.404</b>          |
| Bolivia                | 311.1                                                           | 5921.0                                      | 161.8                                                           | 4861.0                                      | <b>0.520</b>          | <b>0.820</b>          |
| Argentina              | 1929.2                                                          | 19641.0                                     | 161.8                                                           | 4861.0                                      | <b>0.083</b>          | <b>0.2475</b>         |
| Brazil (2015)          | 1164.0                                                          | 15046.0                                     | 161.8                                                           | 4861.0                                      | <b>0.139</b>          | <b>0.323</b>          |
| Chile                  | 1510.0                                                          | 21512.0                                     | 161.8                                                           | 4861.0                                      | <b>0.107</b>          | <b>0.225</b>          |
| Uruguay                | 1594.4                                                          | 18192.0                                     | 161.8                                                           | 4861.0                                      | <b>0.101</b>          | <b>0.267</b>          |

## Appendix 5: Calculation of quality adjusted life years (QALY) correction factors

| <b>Name of country</b> | <b>Life Expectancy at birth (in years)</b> | <b>Median age of disease onset (in years)</b> | <b>Correction factor (D)</b> | <b>Correction factor (E)</b> |
|------------------------|--------------------------------------------|-----------------------------------------------|------------------------------|------------------------------|
| India                  | 70                                         | 50                                            | -                            | -                            |
| Iran_2014              | 77                                         | 50                                            | 0.740                        | 0.920                        |
| Iran_2018              | 77                                         | 45                                            | 0.625                        | 1.015                        |
| Brazil_2022            | 76                                         | 49                                            | 0.740                        | 1.10                         |
| Philippines            | 71                                         | 50                                            | 0.95                         | 0.975                        |
| Columbia_2013          | 77                                         | 50                                            | 0.740                        | 1.00                         |
| Thailand               | 77                                         | 50                                            | 0.740                        | 0.935                        |
| Netherlands            | 82                                         | 51                                            | 0.645                        | 1.039                        |
| Cyprus                 | 81                                         | 52.3                                          | 0.70                         | 1.256                        |
| UK                     | 81                                         | 55                                            | 0.77                         | 1.278                        |
| Peru                   | 77                                         | 55                                            | 0.90                         | 0.8786                       |
| Colombia_2015          | 77                                         | 55                                            | 0.90                         | 0.8786                       |
| Bolivia                | 72                                         | 55                                            | 1.17                         | 0.8786                       |
| Argentina              | 77                                         | 55                                            | 0.91                         | 0.8786                       |
| Brazil_2015            | 76                                         | 55                                            | 0.95                         | 0.8786                       |
| Chile                  | 80                                         | 55                                            | 0.80                         | 0.8786                       |
| Uruguay                | 78                                         | 55                                            | 0.87                         | 0.8786                       |

## Appendix 6a: Results of economic evaluations originally reported by the authors: Trastuzumab

| Year | Country                  | Reported currency | Comparator |        | Intervention |        | Incremental outcomes |       | ICER (₹)  |
|------|--------------------------|-------------------|------------|--------|--------------|--------|----------------------|-------|-----------|
|      |                          |                   | Cost (₹)   | QALYs  | Cost (₹)     | QALYs  | Cost (₹)             | QALYs |           |
| 2017 | Netherlands <sup>1</sup> | EURO              | 15,401,278 | 13.103 | 16,689,481   | 13.930 | 12,88,203            | 0.827 | 1,557,682 |
| 2017 | Netherlands <sup>2</sup> | EURO              | 15,024,211 | 12.666 | 16,445,263   | 13.527 | 14,21,052            | 0.861 | 1,650,466 |
| 2017 | Netherlands <sup>3</sup> | EURO              | 18,192,259 | 13.104 | 17,406,560   | 14.098 | -7,85,699            | 0.994 | -790,441  |
| 2020 | Cyprus                   | EURO              | 292,555    | 1.51   | 3,478,754    | 3.3    | 31,86,199            | 1.79  | 1,779,999 |
| 2015 | Uruguay                  | US\$              | 795,660    | 8.15   | 2,114,640    | 8.73   | 13,18,980            | 0.58  | 2,274,103 |
| 2015 | Chile                    | US\$              | 886,440    | 8.26   | 2,680,680    | 8.86   | 17,94,240            | 0.6   | 2,990,400 |
| 2020 | UK                       | GBP               | 1,882,834  | 8.6    | 4,292,902    | 9.2    | 24,10,068            | 0.6   | 4,016,780 |
| 2018 | Philippines              | PHP               | 5,173,259  | 7.99   | 5,756,505    | 8.99   | 5,83,246             | 1     | 583,245   |
| 2013 | Colombia                 | US\$              | 3,441,895  | 6.83   | 6,048,897    | 7.62   | 26,07,002            | 0.79  | 3,300,002 |
| 2014 | Iran                     | US\$              | 566,131    | 11.11  | 2,604,168    | 11.98  | 20,38,037            | 0.87  | 2,342,571 |
| 2019 | Thailand*                | US\$              | 1474267    | -      | 2305171      | -      | 830904               | 4.59  | 181025    |
| 2015 | Peru                     | US\$              | 1,121,400  | 7.93   | 2,787,480    | 8.49   | 16,66,080            | 0.56  | 2,975,142 |
| 2015 | Colombia                 | US\$              | 3,823,440  | 8.1    | 6,258,480    | 8.68   | 24,35,040            | 0.58  | 4,198,344 |
| 2015 | Bolivia                  | US\$              | 1,073,340  | 7.59   | 3,001,080    | 8.11   | 19,27,740            | 0.52  | 3,707,192 |
| 2015 | Argentina                | US\$              | 651,480    | 8.12   | 3,054,480    | 8.7    | 24,03,000            | 0.58  | 4,143,103 |
| 2015 | Brazil                   | US\$              | 485,940    | 7.88   | 3,732,660    | 8.43   | 32,46,720            | 0.55  | 5,903,127 |
| 2022 | Brazil                   | US\$              | 1,320,547. | 6.48   | 2,475,647    | 7.31   | 11,55,100            | 0.83  | 1,391,686 |
| 2018 | Iran                     | EURO              | 1,069,345  | 11.1   | 2,438,586    | 12.22  | 13,69,241            | 1.12  | 199,556   |

<sup>1</sup>Real-world scenario; <sup>2</sup>Guideline scenario; <sup>3</sup>Trial scenario; \*Absolute number of QALYs not reported by the authors of the original study

## Appendix 5b: Results of economic evaluations originally reported by the authors: IMRT

| Year  | Country       | Reported currency | Comparator |       | Intervention |       | Incremental outcomes |       | ICER (₹)  |
|-------|---------------|-------------------|------------|-------|--------------|-------|----------------------|-------|-----------|
|       |               |                   | Cost (₹)   | QALYs | Cost(₹)      | QALYs | Cost (₹)             | QALYs |           |
| 2013  | US (2yrs)     | US\$              | 605,342    | 1.817 | 1,100,360    | 1.909 | 4,95,018             | 0.092 | 5,380,630 |
| 2013  | US (lifetime) | US\$              | 605,335    | 4.855 | 1,100,361    | 5.123 | 4,95,026             | 0.268 | 1,847,109 |
| 20012 | Canada*       | CAD               | 660,196    | -     | 778,667      | -     | 1,18,471             | 0.480 | 246,814   |

\*Absolute number of QALYs not reported by the authors



Appendix 7a: Results of cost adaptation using Scenario I correction factor B and C: Trastuzumab

| Year | Country                   | Comparator |       | Intervention |       | Incremental outcomes |       | ICER (₹)  |
|------|---------------------------|------------|-------|--------------|-------|----------------------|-------|-----------|
|      |                           | Cost (₹)   | QALYs | Cost (₹)     | QALYs | Cost (₹)             | QALYs |           |
| 2017 | Netherlands <sup>@1</sup> | 2,298,068  | 13.10 | 2,490,284    | 13.93 | 192,216              | 0.83  | 232,425   |
| 2017 | Netherlands <sup>@2</sup> | 2,241,804  | 12.67 | 2,453,843    | 13.53 | 212,039              | 0.86  | 246,270   |
| 2017 | Netherlands <sup>@3</sup> | 2,714,518  | 13.10 | 2,597,281    | 14.09 | -117,236             | 0.99  | -117,944  |
| 2020 | Cyprus <sup>@</sup>       | 53,934     | 1.51  | 641,321      | 3.30  | 587,387              | 1.79  | 328,149   |
| 2015 | Uruguay <sup>@</sup>      | 308,497    | 8.15  | 819,898      | 8.73  | 511,401              | 0.58  | 881,725   |
| 2015 | Chile <sup>@</sup>        | 290,656    | 8.26  | 878,972      | 8.86  | 588,316              | 0.60  | 980,526   |
| 2020 | UK <sup>@</sup>           | 330,315    | 8.60  | 753,125      | 9.20  | 422,810              | 0.60  | 704,683   |
| 2019 | Philippines <sup>#</sup>  | 4,496,496  | 7.99  | 5,003,441    | 8.99  | 506,945              | 1.00  | 506,945   |
| 2013 | Colombia <sup>#</sup>     | 2,369,763  | 6.83  | 4,164,698    | 7.62  | 1,794,935            | 0.79  | 2,272,070 |
| 2014 | Iran <sup>#</sup>         | 240,556    | 11.11 | 1,106,544    | 11.98 | 865,988              | 0.87  | 995,388   |
| 2019 | Thailand <sup>#*</sup>    | 699,273    | -     | 1,093,387    | -     | 394,114              | 4.59  | 85,863    |
| 2015 | Peru <sup>#</sup>         | 734,596    | 7.93  | 1,825,996    | 8.49  | 1,091,400            | 0.56  | 1,948,929 |
| 2015 | Colombia <sup>#</sup>     | 2,243,922  | 8.10  | 3,673,011    | 8.68  | 1,429,090            | 0.58  | 2,463,948 |
| 2015 | Bolivia <sup>#</sup>      | 1,278,525  | 7.59  | 3,574,781    | 8.11  | 2,296,256            | 0.52  | 4,415,877 |
| 2015 | Argentina <sup>#</sup>    | 233,959    | 8.12  | 1,096,922    | 8.70  | 862,963              | 0.58  | 1,487,867 |
| 2015 | Brazil <sup>#</sup>       | 227,805    | 7.88  | 1,749,845    | 8.43  | 1,522,040            | 0.55  | 2,767,345 |
| 2022 | Brazil <sup>#</sup>       | 1,023,514  | 6.48  | 1,918,795    | 7.31  | 895,281              | 0.83  | 1,078,652 |
| 2018 | Iran <sup>#</sup>         | 519,266    | 11.10 | 1,184,160    | 12.22 | 664,894              | 1.12  | 593,655   |

<sup>@</sup>High income countries; <sup>#</sup>middle-income countries; <sup>1</sup>Real-world scenario; <sup>2</sup>Guideline scenario; <sup>3</sup>Trial scenario; \*Absolute number of QALYs not reported by the authors of the original study

Appendix 7b: Results of cost adaptation using Scenario I (correction factor B and C): Intensity Modulated Radiotherapy (IMRT)

| Year | Country       | Comparator |       | Intervention |       | Incremental outcomes |       | ICER (₹) |
|------|---------------|------------|-------|--------------|-------|----------------------|-------|----------|
|      |               | Cost (₹)   | QALYs | Cost (₹)     | QALYs | Cost (₹)             | QALYs |          |
| 2013 | US (2yrs)     | 82,744     | 1.817 | 150,408      | 1.909 | 67664                | 0.092 | 735,478  |
| 2013 | US (lifetime) | 82,744     | 4.855 | 150,408      | 5.123 | 67665                | 0.268 | 252,481  |
| 2012 | Canada*       | 124,108    | -     | 146,379      | -     | 22,271               | 0.48  | 46,398   |

\*Absolute number of QALYs not reported by the authors of the original study

Appendix 8a: Results of cost adaptation using Scenario II (correction factor A, B, and C): Trastuzumab

| Year | Country                   | Comparator |       | Intervention |       | Incremental outcomes |       | ICER (₹)  |
|------|---------------------------|------------|-------|--------------|-------|----------------------|-------|-----------|
|      |                           | Cost (₹)   | QALYs | Cost (₹)     | QALYs | Cost (₹)             | QALYs |           |
| 2017 | Netherlands <sup>@1</sup> | 74,547     | 13.10 | 80,782       | 13.93 | 6,235                | 0.83  | 7,539     |
| 2017 | Netherlands <sup>@2</sup> | 72,722     | 12.67 | 79,600       | 13.53 | 6,878                | 0.86  | 7,988     |
| 2017 | Netherlands <sup>@3</sup> | 88,056     | 13.10 | 84,253       | 14.09 | -3,803               | 0.99  | -3825     |
| 2020 | Cyprus <sup>@</sup>       | 3,865      | 1.51  | 45,963       | 3.30  | 42,098               | 1.79  | 23,518    |
| 2015 | Uruguay <sup>@</sup>      | 31,316     | 8.15  | 83,229       | 8.73  | 51,913               | 0.58  | 89,505    |
| 2015 | Chile <sup>@</sup>        | 31,153     | 8.26  | 94,211       | 8.86  | 63,057               | 0.60  | 105,095   |
| 2020 | UK <sup>@</sup>           | 15,669     | 8.60  | 35,726       | 9.20  | 20,057               | 0.60  | 33,428    |
| 2019 | Philippines <sup>#</sup>  | 2,537,930  | 7.99  | 2,824,062    | 8.99  | 286,132              | 1.00  | 286,132   |
| 2013 | Colombia <sup>#</sup>     | 445,843    | 6.83  | 783,538      | 7.62  | 337,696              | 0.79  | 427,463   |
| 2014 | Iran <sup>#</sup>         | 29,212     | 11.11 | 134,375      | 11.98 | 105,163              | 0.87  | 120,877   |
| 2019 | Thailand <sup>#*</sup>    | 216,029    | -     | 337,783      | -     | 121,755              | 4.59  | 26,526    |
| 2015 | Peru <sup>#</sup>         | 232,670    | 7.93  | 578,351      | 8.49  | 345,681              | 0.56  | 617,287   |
| 2015 | Colombia <sup>#</sup>     | 452,446    | 8.10  | 740,597      | 8.68  | 288,150              | 0.58  | 496,810   |
| 2015 | Bolivia <sup>#</sup>      | 665,111    | 7.59  | 1,859,663    | 8.11  | 119,4552             | 0.52  | 2,297,215 |
| 2015 | Argentina <sup>#</sup>    | 19,628     | 8.12  | 92,027       | 8.70  | 723,99               | 0.58  | 124,825   |
| 2015 | Brazil <sup>#</sup>       | 31,674     | 7.88  | 243,301      | 8.43  | 211,627              | 0.55  | 384,776   |
| 2022 | Brazil <sup>#</sup>       | 139,125    | 6.48  | 260,819      | 7.31  | 121694               | 0.83  | 146,619   |
| 2018 | Iran <sup>#</sup>         | 76,944     | 11.10 | 175,468      | 12.22 | 98523                | 1.12  | 87,966    |

<sup>@</sup>High income countries; <sup>#</sup> middle-income countries; <sup>1</sup>Real-world scenario; <sup>2</sup>Guideline scenario; <sup>3</sup>Trial scenario; \*Absolute number of QALYs not reported by the authors of the original study

## Appendix 8b: Results of cost adaptation using Scenario II (correction factor A, B and C): Intensity Modulated Radiotherapy (IMRT)

| Year | Country       | Comparator |       | Intervention |       | Incremental outcomes |       | ICER (₹) |
|------|---------------|------------|-------|--------------|-------|----------------------|-------|----------|
|      |               | Cost (₹)   | QALYs | Cost (₹)     | QALYs | Cost (₹)             | QALYs |          |
| 2013 | US (2yrs)     | 1605       | 1.817 | 2918         | 1.909 | 1313                 | 0.092 | 14,269   |
| 2013 | US (lifetime) | 1605       | 4.855 | 2918         | 5.123 | 1313                 | 0.268 | 4,898    |
| 2012 | Canada*       | 4145       | -     | 4889         | -     | 744                  | 0.480 | 1,550    |

\*Absolute number of QALYs not reported by the authors of the original study

## Appendix 9a: Results of both cost and QALY adaptation: Trastuzumab

| Year | Country                   | Comparator |       | Intervention |       | Incremental outcomes |       | ICER (₹)  |
|------|---------------------------|------------|-------|--------------|-------|----------------------|-------|-----------|
|      |                           | Cost (₹)   | QALYs | Cost (₹)     | QALYs | Cost (₹)             | QALYs |           |
| 2017 | Netherlands <sup>@1</sup> | 2,298,068  | 8.783 | 2490284      | 9.337 | 192216               | 0.554 | 346,960   |
| 2017 | Netherlands <sup>@2</sup> | 2,241,804  | 8.490 | 2453843      | 9.067 | 212039               | 0.577 | 367,485   |
| 2017 | Netherlands <sup>@3</sup> | 2,714,518  | 8.783 | 2,597,281    | 9.450 | -117,236             | 0.666 | -176,030  |
| 2020 | Cyprus <sup>@</sup>       | 53,934     | 1.322 | 641,321      | 2.888 | 587,387              | 1.567 | 374,848   |
| 2015 | Uruguay <sup>@</sup>      | 308497     | 6.227 | 819,898      | 6.670 | 511,401              | 0.443 | 1,154,404 |
| 2015 | Chile <sup>@</sup>        | 290656     | 5.806 | 878,972      | 6.228 | 588,316              | 0.422 | 1,394,114 |
| 2020 | UK <sup>@</sup>           | 330315     | 5.812 | 753,125      | 6.218 | 422,810              | 0.406 | 1,041,404 |
| 2019 | Philippines <sup>#</sup>  | 4,496,496  | 7.413 | 50,03,441    | 8.341 | 506,945              | 0.928 | 546,276   |
| 2013 | Colombia <sup>#</sup>     | 2,369,763  | 5.059 | 4,164,698    | 5.644 | 1,794,935            | 0.585 | 3,068,265 |
| 2014 | Iran <sup>#</sup>         | 240,556    | 7.571 | 1,106,544    | 8.164 | 865,988              | 0.593 | 1,460,351 |
| 2019 | Thailand <sup>#*</sup>    | 699,273    | -     | 1,093,387    | -     | 394,114              | 4.590 | 85,863    |
| 2015 | Peru <sup>#</sup>         | 734,596    | 6.334 | 1,825,996    | 6.781 | 1,091,400            | 0.447 | 2,441,611 |
| 2015 | Colombia <sup>#</sup>     | 2,243,922  | 6.470 | 3,673,011    | 6.933 | 1,429,090            | 0.463 | 3,086,587 |
| 2015 | Bolivia <sup>#</sup>      | 1,278,525  | 7.845 | 3,574,781    | 8.383 | 2,296,256            | 0.537 | 427,6082  |
| 2015 | Argentina <sup>#</sup>    | 233,959    | 6.486 | 1,096,922    | 6.949 | 862,963              | 0.463 | 1,863,851 |
| 2015 | Brazil <sup>#</sup>       | 227,805    | 6.594 | 1,749,845    | 7.054 | 1,522,040            | 0.460 | 3,308,783 |
| 2022 | Brazil <sup>#</sup>       | 1,023,514  | 5.277 | 1,918,795    | 5.953 | 895,281              | 0.676 | 1,324,380 |
| 2018 | Iran <sup>#</sup>         | 519,266    | 7.564 | 1,184,160    | 8.327 | 664,894              | 0.763 | 871,420   |

<sup>@</sup>High income countries; <sup>#</sup> middle-income countries; <sup>1</sup>Real-world scenario; <sup>2</sup>Guideline scenario; <sup>3</sup>Trial scenario; \*Absolute number of QALYs not reported by the authors of the original study

**Appendix 9b: Results of both cost and QALY adaptation: Intensity Modulated Radiotherapy (IMRT)**

| Year | Country       | Comparator |       | Intervention |       | Incremental outcomes |       | ICER (₹)  |
|------|---------------|------------|-------|--------------|-------|----------------------|-------|-----------|
|      |               | Cost (₹)   | QALYs | Cost (₹)     | QALYs | Cost (₹)             | QALYs |           |
| 2013 | US (2yrs)     | 82,744     | 1.330 | 150,408      | 1.398 | 67,664               | 0.067 | 1,009,911 |
| 2013 | US (lifetime) | 82,743     | 3.550 | 150,408      | 3.750 | 67,665               | 0.268 | 345,229   |
| 2012 | Canada*       | 124,108    | -     | 146,379      | -     | 22,271               | 0.48  | 46,398    |

\*Absolute number of QALYs not reported by the authors of the original study
